# Supplementary material
Source: PubMed Central journal article supplement (PMC9211527)
Supplement: bloodBLD2021012634-suppl1.pdf [file bloodBLD2021012634-suppl1.pdf]

## **Pembrolizumab for B-cell lymphomas relapsing after or refractory to CD19-directed CAR T-cell therapy**

Elise A. Chong, Cécile Alanio, Jakub Svoboda, Sunita D. Nasta, Daniel J. Landsburg, Simon F. Lacey, Marco Ruella, Siddharth Bhattacharyya, E. John Wherry, Stephen J. Schuster

### **Supplemental Tables**

|                                                                                                                                          |                  |
|------------------------------------------------------------------------------------------------------------------------------------------|------------------|
| <b>Supplemental Table S1. Peripheral blood sample time points for CAR qPCR.....</b>                                                      | <b>pages 2-4</b> |
| <b>Supplemental Table 2S. Peripheral blood sample time points for flow CyTOF studies .....</b>                                           | <b>pages 5-6</b> |
| <b>Supplemental Table S3. Cytokine release syndrome, corticosteroid and tocilizumab use<br/>after CAR T cells and pembrolizumab.....</b> | <b>page 7</b>    |
| <b>Supplemental Table S4. Duration of time between CAR T and pembrolizumab,<br/>CAR T expansion, and clinical response.....</b>          | <b>page 8</b>    |

**Table S1. Peripheral blood sample time points for CAR qPCR**

| ID | CART response | Response | Description     | Days from pembrolizumab | Days from CART | Figure 2A |
|----|---------------|----------|-----------------|-------------------------|----------------|-----------|
| 1  | refractory    | PD       | Baseline        | 0                       | 99             | Yes       |
| 1  | refractory    | PD       | Cycle 1, Day 1  | 1                       | 100            | Yes       |
| 1  | refractory    | PD       | Cycle 1, Day 2  | 2                       | 101            | Yes       |
| 1  | refractory    | PD       | Cycle 1, Day 7  | 7                       | 106            | Yes       |
| 1  | refractory    | PD       | Cycle 1, Day 21 | 21                      | 120            | Yes       |
| 1  | refractory    | PD       | Cycle 1, Day 22 | 22                      | 121            | Yes       |
| 2  | refractory    | PD       | Baseline        | 0                       | 92             | Yes       |
| 2  | refractory    | PD       | Cycle 1, Day 1  | 1                       | 99             | Yes       |
| 2  | refractory    | PD       | Cycle 1, Day 2  | 2                       | 100            | Yes       |
| 2  | refractory    | PD       | Cycle 1, Day 3  | 3                       | 101            | Yes       |
| 2  | refractory    | PD       | Cycle 1, Day 7  | 7                       | 105            | Yes       |
| 2  | refractory    | PD       | Cycle 1, Day 13 | 13                      | 111            | Yes       |
| 3  | refractory    | PD       | Baseline        | 0                       | 13             | Yes       |
| 3  | refractory    | PD       | Cycle 1, Day 1  | 1                       | 14             | Yes       |
| 3  | refractory    | PD       | Cycle 1, Day 2  | 2                       | 15             | Yes       |
| 3  | refractory    | PD       | Cycle 1, Day 5  | 5                       | 18             | Yes       |
| 3  | refractory    | PD       | Cycle 1, Day 7  | 7                       | 20             | Yes       |
| 3  | refractory    | PD       | Cycle 1, Day 12 | 12                      | 25             | Yes       |
| 4  | refractory    | CR       | Baseline        | 0                       | 100            | Yes       |
| 4  | refractory    | CR       | Cycle 1, Day 1  | 1                       | 101            | Yes       |
| 4  | refractory    | CR       | Cycle 1, Day 4  | 4                       | 104            | Yes       |
| 4  | refractory    | CR       | Cycle 1, Day 7  | 7                       | 107            | Yes       |
| 4  | refractory    | CR       | Cycle 1, Day 14 | 14                      | 114            | Yes       |
| 4  | refractory    | CR       | Cycle 2, D1     | 27                      | 127            | Yes       |
| 4  | refractory    | CR       | Cycle 3, D1     | 53                      | 153            | Yes       |

Chong et al. Pembrolizumab for lymphoma after CAR T Cells  
 Supplemental Tables Page 3

|    |            |    |                               |     |       |     |
|----|------------|----|-------------------------------|-----|-------|-----|
| 4  | refractory | CR | Cycle 3, Day 21               | 74  | 174   | Yes |
| 4  | refractory | CR | Cycle 3, Day 30               | 83  | 183   | Yes |
| 4  | refractory | CR | Cycle 4, Day 1                | 104 | 204   | Yes |
| 5  | refractory | PR | Baseline                      | 0   | 113   | Yes |
| 5  | refractory | PR | Cycle 1, Day 1<br>post-pembro | 0.5 | 113.5 | Yes |
| 5  | refractory | PR | Cycle 1, Day 2                | 2   | 115   | Yes |
| 5  | refractory | PR | Cycle 1, Day 5                | 5   | 118   | Yes |
| 5  | refractory | PR | Cycle 1, Day 20               | 19  | 132   | Yes |
| 5  | refractory | PR | Cycle 1, Day 30               | 29  | 142   | Yes |
| 5  | refractory | PR | Cycle 2, Day 1                | 41  | 154   | Yes |
| 5  | refractory | PR | Cycle 1, Day 22               | 63  | 176   | Yes |
| 5  | refractory | PR | Cycle 3, Day 18               | 86  | 199   | Yes |
| 6  | refractory | PD | Baseline                      | 0   | 28    | Yes |
| 6  | refractory | PD | Cycle 1, Day 1                | 1   | 29    | Yes |
| 6  | refractory | PD | Cycle 1, Day 2                | 2   | 30    | Yes |
| 6  | refractory | PD | Cycle 1, Day 6                | 6   | 34    | Yes |
| 7  | refractory | PD | Cycle 1, Day 1                | 0   | 24    | Yes |
| 7  | refractory | PD | Cycle 1, Day 3                | 3   | 27    | Yes |
| 7  | refractory | PD | Cycle 1, Day 6                | 6   | 30    | Yes |
| 7  | refractory | PD | Cycle 1, Day 13               | 13  | 37    | Yes |
| 7  | refractory | PD | Cycle 2, Day 1                | 20  | 44    | Yes |
| 7  | refractory | PD | Cycle 2, Day 20               | 40  | 64    | Yes |
| 7  | refractory | PD | Cycle 4, Day 1                | 62  | 86    | Yes |
| 7  | refractory | PD | Cycle 4, Day 20               | 82  | 106   | Yes |
| 8  | refractory | PD | Baseline                      | 0   | 54    | Yes |
| 8  | refractory | PD | Cycle 1, Day 2                | 2   | 56    | Yes |
| 8  | refractory | PD | Cycle 1, Day 7                | 7   | 61    | Yes |
| 8  | refractory | PD | Cycle 1, Day 17               | 17  | 71    | Yes |
| 10 | relapsed   | SD | Baseline                      | 0   | 140   | Yes |

Chong et al. Pembrolizumab for lymphoma after CAR T Cells  
 Supplemental Tables Page 4

|    |          |    |                 |              |              |     |
|----|----------|----|-----------------|--------------|--------------|-----|
| 10 | relapsed | SD | Cycle 1, Day 1  | 1            | 141          | Yes |
| 10 | relapsed | SD | Cycle 1, Day 3  | 3            | 143          | Yes |
| 10 | relapsed | SD | Cycle 1, Day 7  | 6            | 146          | Yes |
| 10 | relapsed | SD | Cycle 1, Day 14 | 13           | 153          | Yes |
| 10 | relapsed | SD | Cycle 2, Day 1  | 20           | 160          | Yes |
| 10 | relapsed | SD | Cycle 3, Day 1  | 41           | 181          | Yes |
| 10 | relapsed | SD | Cycle 4, Day 1  | 65           | 205          | Yes |
| 10 | relapsed | SD | Cycle 5, Day 14 | 100          | 240          | Yes |
| 10 | relapsed | SD | Cycle 5, Day 39 | 125          | 265          | Yes |
| 11 | relapsed | PD | Baseline        | -12          | 813          | Yes |
| 11 | relapsed | PD | Cycle 1, Day 1  | 0            | 825          | Yes |
| 11 | relapsed | PD | Cycle 1, Day 1  | 1            | 826          | Yes |
| 11 | relapsed | PD | Cycle 1, Day 2  | 2            | 827          | Yes |
| 11 | relapsed | PD | Cycle 1, Day 3  | 3            | 828          | Yes |
| 11 | relapsed | PD | Cycle 1, Day 7  | 7            | 832          | Yes |
| 11 | relapsed | PD | Cycle 1, Day 14 | 14           | 839          | Yes |
| 11 | relapsed | PD | Cycle 2, Day 1  | 30           | 855          | Yes |
| 11 | relapsed | PD | Cycle 3, Day 1  | 52           | 877          | Yes |
| 11 | relapsed | PD | Cycle 3, Day 29 | 80           | 905          | Yes |
| 12 | relapsed | PD | Cycle 1, Day 1  | 0            | 1301         | Yes |
| 12 | relapsed | PD | Cycle 1, Day 1  | 1            | 1302         | Yes |
| 12 | relapsed | PD | Cycle 1, Day 2  | 2            | 1303         | Yes |
| 12 | relapsed | PD | Cycle 1, Day 4  | 4            | 1305         | Yes |
| 12 | relapsed | PD | Cycle 1, Day 8  | 8            | 1309         | Yes |
| 12 | relapsed | PD | Cycle 1, Day 15 | 15           | 1316         | Yes |
| 13 | relapsed | PR | Cycle 1, Day 0  | Not depicted | Not depicted | No  |

**Table 2S. Peripheral blood sample time points for flow CyTOF studies**

| Patient ID | CART response | Cycle | Days from first pembrolizumab dose | Days from most recent pembrolizumab dose | Time                | Time point | Pembrolizumab Clinical Benefit | Figure 2D | Figure 3 | Figure 4 |
|------------|---------------|-------|------------------------------------|------------------------------------------|---------------------|------------|--------------------------------|-----------|----------|----------|
| 1          | refractory    | 1     | 7                                  | 7                                        | CART qPCR peak 1    | Post       | Non Responders                 | Yes       | Yes      | Yes      |
| 2          | refractory    |       |                                    |                                          |                     |            | Non Responders                 | No        | No       | No       |
| 3          | refractory    | 1     | 0                                  | 0                                        | Baseline            | Pre        | Non Responders                 | Yes       | Yes      | Yes      |
| 3          | refractory    | 1     | 2                                  | 2                                        | CART qPCR peak 1    | Post       | Non Responders                 | Yes       | Yes      | Yes      |
| 3          | refractory    | 1     | 5                                  | 5                                        | CART qPCR trough    | Later      | Non Responders                 | Yes       | Yes      | No       |
| 4          | refractory    | 1     | 0                                  | 0                                        | Baseline            | Pre        | Responders                     | Yes       | Yes      | Yes      |
| 4          | refractory    | 1     | 4                                  | 4                                        | CART qPCR peak 1    | Post       | Responders                     | Yes       | Yes      | Yes      |
| 4          | refractory    | 2     | 27                                 | 27                                       | CART qPCR peak 2    | Later      | Responders                     | Yes       | Yes      | No       |
| 4          | refractory    | 3     | 74                                 | 21                                       | CART qPCR peak 3    | Later      | Responders                     | Yes       | Yes      | No       |
| 4          | refractory    | 9     | 235                                | 11                                       | last dose of pembro | Later      | Responders                     | Yes       | Yes      | No       |
| 5          | refractory    | 1     | 0                                  | 0                                        | Baseline            | Pre        | Responders                     | Yes       | Yes      | Yes      |
| 5          | refractory    | 1     | 2                                  | 2                                        | CART qPCR peak 1    | Post       | Responders                     | Yes       | Yes      | Yes      |
| 5          | refractory    | 2     | 41                                 | 41                                       | CART qPCR peak 2    | Later      | Responders                     | Yes       | Yes      | No       |
| 5          | refractory    | 2     | 63                                 | 22                                       | CART trough         | Later      | Responders                     | Yes       | Yes      | No       |
| 6          | refractory    | 1     | 0                                  | 0                                        | Baseline            | Pre        | Non Responders                 | Yes       | Yes      | Yes      |
| 6          | refractory    | 1     | 2                                  | 2                                        | CART qPCR peak 1    | Post       | Non Responders                 | Yes       | Yes      | Yes      |
| 6          | refractory    | 1     | 6                                  | 6                                        | CART qPCR trough    | Later      | Non Responders                 | Yes       | Yes      | No       |
| 7          | refractory    | 1     | 0                                  | 0                                        | Baseline            | Pre        | Non Responders                 | Yes       | Yes      | Yes      |
| 7          | refractory    | 1     | 13                                 | 13                                       | CART qPCR peak 1    | Post       | Non Responders                 | Yes       | Yes      | Yes      |
| 7          | refractory    | 4     | 82                                 | 20                                       | CART qPCR trough    | Later      | Non Responders                 | Yes       | Yes      | No       |
| 8          | refractory    | 1     | 0                                  | 0                                        | Baseline            | Pre        | Non Responders                 | Yes       | Yes      | Yes      |
| 8          | refractory    | 1     | 7                                  | 7                                        | CART qPCR peak 1    | Post       | Non Responders                 | Yes       | Yes      | Yes      |
| 10         | refractory    | 1     | 0                                  | 0                                        | Baseline            | Pre        | Responders                     | Yes       | Yes      | Yes      |
| 10         | refractory    | 1     | 13                                 | 13                                       | CART qPCR peak 1    | Post       | Responders                     | Yes       | Yes      | Yes      |

Chong et al. Pembrolizumab for lymphoma after CAR T Cells  
 Supplemental Tables Page 6

|    |            |   |     |    |                  |       |                |     |     |     |
|----|------------|---|-----|----|------------------|-------|----------------|-----|-----|-----|
| 10 | refractory | 3 | 65  | 24 | CART qPCR peak 2 | Later | Responders     | Yes | Yes | No  |
| 10 | refractory | 4 | 100 | 14 | CART qPCR trough | Later | Responders     | Yes | Yes | No  |
| 11 | relapsed   | 1 | 0   | 0  | Baseline         | Pre   | Non Responders | Yes | Yes | Yes |
| 11 | relapsed   | 1 | 3   | 3  | CART qPCR peak 1 | Post  | Non Responders | Yes | Yes | Yes |
| 12 | relapsed   | 1 | 0   | 0  | Baseline         | Pre   | Non Responders | Yes | Yes | Yes |
| 12 | relapsed   | 1 | 2   | 2  | CART qPCR peak 1 | Post  | Non Responders | Yes | Yes | Yes |
| 13 | relapsed   | 1 | 0   | 0  | Baseline         | Pre   | Responders     | Yes | Yes | Yes |
| 13 | relapsed   | 1 | 3   | 3  | CART qPCR peak 1 | Post  | Responders     | Yes | Yes | Yes |

**Table 3S. Cytokine release syndrome, corticosteroid and tocilizumab use after CAR T cells and pembrolizumab**

| ID | CRS grade post CAR T cells | Corticosteroids post CAR T cells | Tocilizumab use post CAR T cells | Infusion related reaction post pembrolizumab | Fever or CRS grade post pembrolizumab | Corticosteroids post pembrolizumab** |
|----|----------------------------|----------------------------------|----------------------------------|----------------------------------------------|---------------------------------------|--------------------------------------|
| 1  | 1                          | No                               | No                               | No                                           | No                                    | No                                   |
| 2  | --                         | No                               | No                               | No                                           | No                                    | No                                   |
| 3  | 1                          | No                               | No                               | No                                           | Yes                                   | No                                   |
| 4  | --                         | No                               | No                               | No                                           | No                                    | No                                   |
| 5  | 1                          | No                               | No                               | Yes – Grade 2                                | Yes – Grade 2                         | Yes – once for IRR                   |
| 6  | 1                          | No                               | No                               | No                                           | No                                    | No                                   |
| 7  | --                         | No                               | No                               | No                                           | Yes                                   | No                                   |
| 8  | 1                          | No                               | No                               | No                                           | No                                    | No                                   |
| 10 | 2                          | No                               | No                               | No                                           | No                                    | No                                   |
| 11 | 2                          | No                               | No                               | No                                           | No                                    | No                                   |
| 12 | 2                          | No                               | No                               | No                                           | No                                    | Yes – for facial swelling            |
| 13 | 3                          | No                               | Yes – Day 4*                     | No                                           | No                                    | No                                   |

\*This patient received pembrolizumab 20.4 months after CAR T cell infusion

\*\*One patient received hydrocortisone 50mg X 1 dose for a grade 2 infusion-related reaction after the first dose of pembrolizumab. One patient received more than one dose of corticosteroids (beginning day 4, solumedrol 1mg/kg) to palliate facial swelling from tumor that was thought tumor flare/pseudoprogression versus progressive lymphoma; biopsy confirmed that facial swelling was due to progressive lymphoma, and the patient was withdrawn from study

**Table 4S. Duration of time between CAR T and pembrolizumab, CAR T expansion, and clinical response**

| Subject ID | Months between CAR T infusion & pembrolizumab | CAR19 transgene peak copies / uL after pembrolizumab | Response to pembrolizumab <sup>1</sup> |
|------------|-----------------------------------------------|------------------------------------------------------|----------------------------------------|
| -03        | 0.4                                           | 748.9                                                | PD                                     |
| -07        | 0.8                                           | 8511.1                                               | PD                                     |
| -06        | 0.9                                           | 18080.5                                              | PD                                     |
| -08        | 1.8                                           | 38.5                                                 | PD                                     |
| -02        | 3.2                                           | 8.0                                                  | PD                                     |
| -01        | 3.3                                           | 76.1                                                 | PD                                     |
| -04        | 3.3                                           | 2068.5                                               | CR                                     |
| -05        | 3.7                                           | 200.9                                                | PR                                     |
| -10        | 4.6                                           | 277.8                                                | SD                                     |
| -11        | 20.2                                          | 25.1                                                 | PD                                     |
| -12        | 27.1                                          | 23.1                                                 | PR                                     |
| -13        | 42.8                                          | 41.9                                                 | PD                                     |

Abbreviations:

CR: complete response; PR: partial response; SD: stable disease; PD: progressive disease.

<sup>1</sup>Responses assessment was determined by 2007 Revised response criteria for malignant lymphoma<sup>28</sup>
